1 **Conformational Dynamics of Nonenveloped Circovirus Capsid to the Host Cell Receptor**

2 Jiarong Li<sup>1,2¶</sup>, Jinyan Gu<sup>1,2¶</sup>, Shengnan Wang<sup>1</sup>, Cui Lin<sup>2</sup>, Jianwei Zhou<sup>2</sup>, Jin Lei<sup>1</sup> and Jiyong Zhou<sup>2,3\*</sup>

3 <sup>1</sup>MOE International Joint collaborative Research Laboratory for Animal Health and Food Safety, Institute of  
4 Immunology, Nanjing Agricultural University, Nanjing, China.

5 <sup>2</sup>MOA Key Laboratory of Animal Virology, Zhejiang University, Hangzhou, China.

6 <sup>3</sup>Collaborative Innovation Center and State Key Laboratory for Diagnosis and Treatment of Infectious Diseases, The  
7 First Affiliated Hospital, Zhejiang University, Hangzhou, China.

8 <sup>¶</sup>Two authors are equal to this work

9 **\*Correspondence**

10 [jyzhou@zju.edu.cn](mailto:jyzhou@zju.edu.cn)(J.Y.Z)

## 11 **Abstract**

12 Circovirus, comprising one capsid protein, is the smallest nonenveloped virus and induces lymphopenia. Circovirus  
13 can be used to explore the cell adhesion mechanism of nonenveloped viruses. We developed a single-molecule  
14 fluorescence resonance energy transfer (smFRET) assay to directly visualize the capsid's conformational feature. The  
15 capsid underwent reversible dynamic transformation between three conformations. The cell surface receptor heparan  
16 sulfate (HS) altered the dynamic equilibrium of the capsid to the high-FRET state, revealing the HS binding region.  
17 Neutralizing antibodies restricted capsid transition to a low-FRET state, masking the HS binding domain. The lack of  
18 positively charged amino acids in the HS binding site reduced cell surface affinity and attenuated virus infectivity via  
19 conformational changes. These intrinsic characteristics of the capsid suggested that conformational dynamics is critical  
20 for the structural changes occurring upon cell surface receptor binding, supporting a dynamics-based mechanism of  
21 receptor binding.

## 23 **Importance**

24 Viral proteins were common working as ligand to interact with cell surface glycosaminoglycan receptors to achieve the  
25 virus attachment, during which the conformational dynamics of the protein ligand are also vital for the binding properties.  
26 In this study, PCV2 capsid and heparin sulfate were used to study the protein conformational dynamics of nonenveloped  
27 and icosahedral circovirus capsid during triggering to cell surface receptor. we demonstrated the PCV2 capsid could acts  
28 as a dynamic machine, spontaneously adopting multiple conformations with reversible interconversion and intrinsic  
29 conformational features could be regulated by glycosaminoglycan receptors and neutralizing antibodies. These increased  
30 our understanding of the mechanism by which nonenveloped virus attach to cells.

31

## 32 INTRODUCTION

33 Virus attachment to the host cell surface is the initial step in establishing effective infection. The host cell membranes  
34 are abundantly decorated with proteoglycans, which comprise a core protein and several types of covalently attached  
35 glycosaminoglycan chains (GAGs) that are capable of binding protein ligands (1, 2). GAGs include heparan sulfate (HS),  
36 chondroitin sulfate (CS), and keratan sulfate, which are characterized by disaccharide repeating units that form  
37 the blocks of the polysaccharides (3-5). Epimerization and terminal sulfation are the most common modification patterns  
38 during the processing of GAG chains, and are also vital for the binding properties of the ligands (6, 7). Among these  
39 GAGs, HS is utilized by numerous viruses for attachment to cell surfaces, such as the hepatitis C virus (8), human  
40 enterovirus 71(9), rabies virus(10), human papillomavirus type 11(11), porcine epidemic diarrhea virus(12), and porcine  
41 circovirus type 2 (PCV2)(13). The canonical HS binding motif has been identified as “XBBXB” or “XBBBXXB”  
42 (“B” represents a basic amino acid and “X” represents a neutral/hydrophobic amino acid) through molecular  
43 modeling based on authenticated HS binding protein receptors (14). However, the regulation of virus-ligand  
44 conformational features and the mechanism of binding to HS are unknown.

45 Since 1996, single-molecule Fluorescence Resonance Energy Transfer (smFRET) has been used to analyze replication,  
46 transcription, translation, RNA folding, non-canonical DNA dynamics, and protein conformational changes (15-17). The  
47 envelope glycoprotein of enveloped viruses is a membrane fusion machine that promotes viral entry into host cells. To  
48 date, the conformation dynamics of the envelope glycoproteins of HIV-1 and flu virus have been analyzed. The  
49 glycoprotein gp120 of the HIV-1 envelope was shown to have three distinct pre-fusion conformations, whose relative  
50 occupancies were remodeled by receptor CD4 and antibody binding (18). In addition, the hemagglutinin of the flu virus  
51 envelope was revealed to undergo reversible exchange between the pre-fusion and two intermediate conformations (19).  
52 However, for the numerous nonenveloped viruses, the direct visualization and conformational dynamic assessment of the  
53 capsid remain unreported.

54      Circovirus is the smallest nonenveloped icosahedral virus, with a circular, single-stranded genomic DNA, which infects  
55      a variety of species ranging from animals to plants with different pathogenicities (20). PCV2, with an unique structural  
56      capsid protein, is a representative circovirus that causes significant morbidity and mortality in swine (21-23). The crystal  
57      structure of the PCV2 virus-like particle (VLP) revealed that the capsid protein comprises two  $\beta$ -sheets, each containing  
58      four antiparallel  $\beta$ -strands, which were labeled as B to I (24). The residues between the  $\beta$ -strands form eight loops,  
59      among which the CD and C-terminal loops are exposed on the VLP exterior and can accommodate the insertion of short  
60      foreign peptides (25-27). The capsid protein was also reported to have the neutralizing and non-neutralizing epitope sites,  
61      and the putative canonical HS binding motif <sup>98</sup>IRKVKV<sup>103</sup>(13, 28, 29). Recently, Dhindwai et al. also proposed the  
62      existence of multiple weak binding sites that interact with HS of the PCV2 VLP surface. However, as the simplest  
63      nonenveloped virus, in which the capsid is only composed of one protein, what are conformational features of the  
64      circovirus capsid during binding to the cell surface receptor? Does the binding motif move toward to the exterior face of  
65      the virus particle to achieve the interaction with the GAG molecules? What is the key factor of the motif and the GAGs  
66      that facilitate the interaction by adjusting of the capsid's conformational behavior? In the present study we aimed to  
67      answer some of these using the PCV2 Capsid and HS as a model to explore the conformational dynamics of  
68      nonenveloped virus invasion of cells.

69      In the present study, we developed an smFRET-imaging assay to detect the conformational dynamics of the virus  
70      capsid protein (Figure 1a). Our results revealed that the Capsid worked in a dynamic manner, undergoing spontaneous  
71      and reversible transitions between three distinct conformations. The binding of the GaGs and that of neutralizing  
72      antibodies shifted the dynamic equilibrium associated with the virus binding to the host cells. Both the negatively and  
73      positively charged distribution of the receptor and the binding motif peptides played a critical role in the capsid's  
74      conformational dynamics, and ultimately influenced the affinity for the cell surface receptor. The allostery of the capsid  
75      occurs during direct interactions with the GAG molecules might provide a strategy by which the circovirus strengthen its

76 attachment to the host cells, ultimately resulting in infection.

77

## 78 **RESULTS**

### 79 **Site-specific Attachment of Fluorophores to the Capsid Protein**

80 To develop an smFRET-imaging assay to visualize the conformational dynamics of the PCV2 capsid (Figure 1a), we  
81 attached the Cy5 fluorophore (acceptor fluorophore) at position <sup>108</sup>Cysteine in the DE loop of the capsid(Figure S1a)(30).  
82 To install the donor fluorophore, we inserted the A1 Tag peptide (GDSLDMLEWSLM) at position <sup>80</sup>Leucine of the CD  
83 Loop or at position <sup>233</sup>Proline of the C-terminal Loop, which are relatively non-conserved regions of capsid. Thus, the  
84 Alexa 547 fluorophore was labeled using holo-acyl carrier protein synthetase (ACPs), which catalyzed serine  
85 hydroxylation of the A1 peptide and the 4'-phosphopantetheine moiety of CoA to form a phosphodiester bond (31). The  
86 Avi-peptides were attached at the C-terminus of the capsid to accomplish biotinylation processing via the BirA  
87 catalyzed (Figure S1a) (32). According to previously reported structure of the capsid, these two designed models,  
88 termed Capsid 3XA (3XA) and Capsid 3XC (3XC), were used to demonstrate that the distances between the donor and  
89 acceptor fluorophores was 68 Å (3XA) and 59 Å (3XC) (Figure 1b), which satisfied the demand of the smFRET  
90 experiment (30). Western blotting and typhoon assays confirmed Cy5 was co-localized with Alexa 547, demonstrating  
91 that 3XA and 3XC were specifically labeled with fluorophore pair and biotin (Figure S1b).  
92 After optimization of the labeling reaction *in vitro*, the labeling efficiencies of Alexa 547 and Cy5 were approximately  
93 45% and 71%, respectively, indicating that approximately 32% of molecules would be suitable for smFRET analysis  
94 using total internal reflection fluorescence (TIRF) microscopy. To assess whether the secondary structure of the capsid  
95 was disturbed by the insertion of exogenous peptides, we performed a circular dichroism (CD) assay of soluble wild-type  
96 (WT) capsid, 3XA, and 3XC over the spectrum of 200–300 nm. The CD spectrum curves of 3XA and 3XC were  
97 identical to that of the WT capsid (Figure 1c), indicating that the insertion of exogenous peptides in 3XA and 3XC had a

98 negligible effect on the protein secondary structure. Using transmission electron microscopy, we also observed that the  
99 3XA and 3XC monomers could self-assemble into a hexagonal virus-like particle with a diameter of almost 17 nm  
100 (Figure 1d), similar to the PCV2 virion, indicating that the intermolecular interaction of the capsid monomers was still  
101 viable. Taken together, 3XA and 3XC, with short amino acid modifications, retained the intrinsic structural features  
102 similar to the WT capsid, and could also be imaged using TIRF microscopy.

### 103 **Capsids Spontaneously Interconvert between Three Distinct Conformations**

104 To disperse the capsid into monomer and minimize the disturbance of oligomerization to imaging on the TRIF  
105 microscopy, we treated 3XA and 3XC with imaging buffer containing different concentrations of NaCl for 30 min. The  
106 capsids treated with 1500 mM NaCl were immobilized on the covered quartz microscope slide in a single molecule  
107 state (Figure S1c). We first visualized the conformational landscape of 3XA and 3XC, the smFRET trajectories of 3XA  
108 displayed a spontaneous reversible model with fluctuations between three conformations characterized by distinct  
109 FRET values of approximately 0.29, 0.48, and 0.68. Similarly, 3XC exhibited a conformational distribution with  
110 distinct FRET values of approximately 0.39, 0.59, and 0.78 (Fig. 2a). Both the smFRET trajectories displayed a  
111 predominant low-FRET state with a low frequency of transitions to the intermediate- and high-FRET states,  
112 corresponding to 77% and 79% low-FRET state occupancies in the histograms of the 3XA and 3XC FRET trajectories,  
113 respectively (Figure 2b). The FRET values of the low-FRET state were consistent with the 68Å and 59Å  
114 inter-fluorophore distance predicted based on the structure of the of 3XA and 3XC. Moreover, a direct  
115 transition between the low- and high-FRET states of the capsid was hardly observed (Figure 2a). Collectively, these  
116 data demonstrated that the low-FRET state was the predominant conformation for 3XA and 3XC, and the intermediate  
117 FRET state could be essential for the transition between low- and high-FRET states.

### 118 **Binding to Heparan Sulfate Alters the Conformational features of the Capsid**

119 Heparan sulfate (HS) is the cell surface receptor for PCV2 attachment (13). The negative charges on the GAGs are

120 acquired through N- and O-sulfation of the carbohydrate moieties and are crucial for their interactions (33). To determine  
121 if the conformational equilibrium of the capsid changed during binding to cell receptor HS, we performed smFRET  
122 analysis of 3XA and 3XC with the addition of heparin, an analog of heparan sulfate with a similar structure to HS's  
123 sulfated domain. Compared with the smFRET data of free 3XA and 3XC, the trajectories of capsids with heparin  
124 exhibited a high-FRET-preponderant model and intermittently dropped to an intermediate state or low state for both 3XA  
125 and 3XC. The occupancy of the high-FRET state was significantly elevated to ~70% from ~6.3%, and the occupancy of  
126 the low-FRET state significantly decreased to ~4% from ~77% (Figures 2, 3A and S2A;  $P < 0.001$ ), demonstrating that  
127 the high-FRET state is the preponderant state of the smFRET trajectory for the capsid-heparin binding complex.  
128 Interestingly, in contrast to the capsid-heparin complexes, the mixture of capsid and De-N-sulfated acetylated heparin  
129 (DeN heparin, a highly sulfated HS analog without N-sulfation used to represent the incompletely negative charged HS)  
130 exhibited an marked increase in the intermediate FRET state (47%) and high-FRET state (37.7%), as well as a decrease  
131 in the low-FRET state (Figures 2B, 3B and S2B). However, as a negative control, a mixture of capsid and chondroitin  
132 sulfate A (CSA, another member of the cell surface glycosaminoglycans but does not act as a binding receptor during the  
133 PCV2 infection) exhibited a similar conformational distribution to the free capsid (Figures 2, 3c and S2c). These findings  
134 demonstrated that the binding of negatively charged heparin altered the conformational features of the capsid and that the  
135 high-FRET state of the capsid is the main conformation during the HS interaction.

136 To verify whether the changes in capsid conformation affected the affinity to host cells, we performed GAGs  
137 competitive binding experiments with PK-15 and 3D4/31 cells. The results of immunoblotting and quantitative real-time  
138 PCR (qPCR) assays showed that both the level of bound VLPs and attached PCV2 particles to host PK15 and 3D4/31  
139 cells in the presence of added soluble heparin decreased significantly compared with those of free VLPs and PCV2;  
140 however, the addition of DeN heparin or CSA had no significant effect (Figure 3d-e and S2d-e). In addition, in the flow  
141 cytometry assay, cell adhesion of VLP and PCV2 in the presence added GAGs showed that for PK15 cells, 70.3% bound

142 VLP and 30.4% bound PCV2, which was an obvious decrease compared with free VLP and PCV2, VLP and PCV2 with  
143 added DeN heparin, and VLP and PCV2 with added CSA (Figure 3f-g). Surprisingly, the addition of DeN heparin to  
144 VLP and PCV2 showed almost similar occupancies to those of VLP and PCV2 attached to cells compared with the CSA  
145 addition as a negative control. This result demonstrated that heparin without a negative charge acquired from N-sulfation  
146 is a nonfunctional HS analog for binding VLP and PCV2 virions. The results obtained using 3D4/31 cells were similar to  
147 those gained using PK15 cells (Figure S2f-g). In summary, soluble heparin can bind to the capsid and promote the  
148 high-FRET state, simultaneously block the binding of the capsid to the host cells.

#### 149 **Capsid-targeting Neutralizing Antibodies Facilitate Stable Low-FRET Conformations**

150 To investigate whether anti-capsid neutralizing monoclonal antibodies (mAbs) could block the virus binding to the cell  
151 surface by modifying the conformational transitions of the capsid protein, we incubated 3XA and 3XC with the mAbs  
152 3F6, 5E11, 6H9, and 8A12 before smFRET imaging (29). Interestingly, the neutralizing mAb 3F6 induced an absolute  
153 occupancy of the low-FRET state (94%) of the capsid and resulted in the almost complete disappearance of the  
154 intermediate-FRET and high-FRET states compared with the trajectories of the antibody-free capsid (Figures 4a and 2a).  
155 Another neutralizing mAb, 6H9, displayed similar effects to 3F6 (Figure S3a). Interestingly, although transition to the  
156 intermediate-FRET state and high-FRET state were obviously inhibited, they were not entirely abolished, implying that  
157 the mobility of the capsid was maintained. In contrast, the conformation of the capsid after treatment with  
158 non-neutralizing mAbs 5E11 and 8A12 was similar to that of the antibody-free Capsid, with only a slight increase in the  
159 intermediate-FRET state, demonstrating the negligible effect of nonneutralizing mAbs in altering the antigen's  
160 conformation (Figures 4b, S3b and 2a). Based on these results, we concluded that neutralizing antibodies could restrict  
161 the conformation of the capsid to the low-FRET state by inducing an almost complete conversion of the capsid's  
162 conformation from the intermediate- and high-FRET states to the low-FRET state without impairing the mobility of the  
163 antigen.



164 **The Positively Charged Residues <sup>99</sup>R<sup>100</sup>K within the HS Binding Motif of the Capsid Enhance the High-FRET**  
165 **State During Interaction with Heparan Sulfate**

166 The motif <sup>98</sup>IRKVKV<sup>103</sup> within the capsid protein is predicted to be the binding site of HS, and is located in the interior  
167 of the three-dimensional crystal structure of the capsid (13). The interaction between the GAGs and a protein mainly  
168 depended on the positively charged properties of the amino acids in the binding motif (34). Amino acid sequence  
169 alignment revealed that the predicted HS binding motif <sup>98</sup>IRKVKV<sup>103</sup> is highly conserved among different subtypes of  
170 PCV2 (Figure S4a). To investigate the contribution of positively charged amino acids to conformational changes during  
171 the interaction with HS, we performed <sup>99</sup> arginine (R) to alanine (A) single-point mutation (SM), and <sup>99</sup>R<sup>100</sup>lysine (K) to  
172 A double-point mutations (DM) within the HS binding site of the capsid (Figure S4b). We subjected the dual-labeled  
173 Capsid-SM and Capsid-DM to smFRET analysis, which displayed similar conformational dynamics to Capsid-WT  
174 (Figures 2a, 5a-b and S4c-d), such as the interconversion between the three intrinsic states and a predominant occupancy  
175 of the low-FRET state with occasional transition to intermediate- and high- states. This result implied that the positively  
176 charged residues <sup>99</sup>R<sup>110</sup>K within the HS binding motif did not directly regulate capsid conformational dynamics in the  
177 absence of receptor.

178 To further verify the role of the positively charged amino acids during the capsid's interaction with HS, we observe the  
179 smFRET landscapes of Capsid-SM and Capsid-DM in the presence of heparin. The trajectories of Capsid-SM and  
180 Capsid-DM still displayed the three independent states; however, the trajectories were shifted toward increased  
181 intermediate- and high-FRET states (Figure 5c-d and S4e-f). The data acquired from Capsid-SM in the presence of  
182 heparin demonstrated that the occupancy of the high-FRET was ~54%, which was significantly lower than that for  
183 Capsid-WT in the presence of heparin (~77%), and the occupancies of intermediate and low FRET states both showed  
184 various degrees of upregulation (Figures 5c, 3a, S2a and S4e). This tendency was more obvious in the mutant lacked two  
185 positively charged amino acids in the binding motif. The trajectories of Capsid-DM in the presence of heparin displayed

186 more frequent transitions to the intermediate and low-FRET states compared with Capsid-SM and Capsid-WT (Figures  
187 5d, 3a, S2a and S4f), resulting in a further reduction of high-FRET state occupancy (~38%), accompanied by a slight  
188 increase in the intermediate-FRET state occupancy and increased low-FRET state occupancy. This data indicated that  
189 replacement of the positive charge amino acids within the HS binding motif decreased the occupancy of the high-FRET  
190 state significantly during the interaction with heparin. We further delineated the relationship between the numbers of  
191 positively charged amino acids and the occupancy fluctuation of each state. Figure 5e shows that decreasing high-FRET  
192 occupancy correlated positively with the decreasing number of positively charged amino acids. By contrast, the  
193 occupancies of intermediate- and low-FRET states correlated negatively with the number of positively charged amino  
194 acids (Figure 5e). Taken together, these findings indicated that the positively charged residues <sup>99</sup>R<sup>100</sup>K within the  
195 HS binding motif of the capsid associating with the maintaining of high-FRET state during the interaction with HS.

#### 196 **Residues <sup>99</sup>R<sup>100</sup>K of the HS Binding Site are Critical for The Affinity of the Capsid to the Host Cell**

197 To further investigate the contribution of positively charged amino acid residues within the HS binding motif of the  
198 capsid to receptor binding, we performed binding force and cell adhesion tests of Capsid-SM and Capsid-DM. As  
199 expected, the amount of Capsid-SM and Capsid-DM that bound to the HiTrap™ Heparin-Sepharose HP Column was  
200 significant decreased compared with that of the WT capsid (Figure 6a). Simultaneously, the dissociation constants ( $K_d$ )  
201 of SM ( $821 \pm 18.1 \mu\text{M}$ ) and DM ( $883 \pm 15.8 \mu\text{M}$ ) displayed an obvious increase compared with that of WT Capsid ( $252$   
202  $\pm 18.7 \mu\text{M}$ ) measured by microscale thermophoresis (Figure 6b). This indicated that the lack of <sup>99</sup>R<sup>100</sup>K within the  
203 HS binding motif <sup>98</sup>IRKVKV<sup>103</sup> would critically impair the affinity of the capsid for heparin.

204 Given that the affinity of the capsid for heparin was weakened by partial replacement of positively charged amino acids,  
205 we next asked whether the lack of these residues would disturb the virus lifecycle. Therefore, we performed virus rescue  
206 of PCV2 with the SM and DM mutations. The self-cyclized PCV2 genomes with the <sup>99</sup>A or <sup>99</sup>A<sup>100</sup>A mutation of the  
207 capsid gene were transfected into PK-15 cells to rescue the virus, which was serially passaged to detect infectivity using

208 the TCID<sub>50</sub> assay (35). The one-step growth curve indicated the genomes with the SM or DM mutations could be  
209 rescued; however, the infectivity of the rescued virus was weakened compared with that of the WT virus (Figure 6c),  
210 demonstrating that the replacement of these positive charged residues within the HS binding site of the capsid could  
211 attenuated the replication ability of PCV2. To further validate whether the weakened replication ability of PCV2 particles  
212 with SM or DM involves cell attachment, we attempted single cell adhesion assays of SM- and DM-Capsid proteins  
213 using flow cytometry. It showed the number of adhesive cells presenting Capsid-SM or Capsid-DM molecules was  
214 significant decreased compared with that of the WT Capsid (Figures 6d and 6e). However, the number of adhesive cells  
215 in the presence of HS was not significantly different to that of free Capsid-SM or Capsid-DM (figures 6f, 6g, 6h and 6i),  
216 suggesting that the positive charge deficiencies in the HS binding motif caused the capsid non-sensitive to HS and  
217 reduced the cell binding ability. Thus, these *in vivo* and *in vitro* experiments demonstrated that the positively charged  
218 residues <sup>99</sup>R<sup>100</sup>K within the HS binding motif of the capsid are critical to enhance virus attachment to the host cell  
219 surface and to regulate virus infectivity.

220

## 221 **DISCUSSION**

222 Heparan sulfate, a GAG present on the cell membrane, was identified as the cell surface receptor for various proteins and  
223 enveloped and nonenveloped viruses (36-38). In the present study, PCV2 was used as a model nonenveloped virus, who  
224 is the smallest DNA virus with capsid comprises one unique capsid protein, and used HS as the receptor for attachment  
225 to host cells (13, 24). The direct observation of the capsid conformational changes for nonenveloped viruses has been not  
226 yet been achieved because of the lack of methodology to probe such dynamics on a relevant timescale. In the present  
227 study, the usage of smFRET imaging provided the first real-time visualization of the conformational dynamics of the  
228 capsid. The results of the present study indicated that the Capsid may be regarded as a dynamic machine, undergoing  
229 spontaneous, reversible fluctuations between multiple conformations during attachment to the cell surface. Our results

230 suggested that receptor binding regulates the intrinsic conformational dynamics of the capsid, allowing the virus to  
231 invade the host cells.

### 232 **The Multiple Conformations of the Capsid with Spontaneous Reversible Interconversion**

233 The crystal structure of the PCV2 VLP revealed that the HS-binding motif <sup>98</sup>IRKVKV<sup>103</sup> was deeply hidden in the  
234 interior of the VLP(13, 24). In the present study, Cy5 and A547 were labeled at <sup>108</sup>cysteine (Cys) near the HS-binding  
235 site and at the CD loop or C-terminal loop far from the HS-binding site of the capsid (Figure S1a). The smFRET  
236 approach presented a landscape in which the capsid spontaneously transitioned among at least three conformations,  
237 represented by the low-, intermediate- and high-FRET states and the low-FRET state of the capsid, corresponds to the  
238 previously described crystal structure of PCV2 VLP (24). However, the current three-dimensional structure of the VLP  
239 does not depict the conformations corresponding to the intermediate- and high- FRET states, which we captured using  
240 the smFRET assay. The capsid displayed a predominantly low-FRET landscape, with some transitions to the  
241 intermediate- or high-FRET states (Figure 2a). Notably, the structural proteins of enveloped viruses, such as glycoprotein  
242 gp120 subunit of the HIV-1 envelope trimmers (18) and hemagglutinin of influenza virus (19), show similar dynamic  
243 interconversions between multiple distinct conformations. Thus, for the first time, we demonstrated that the capsid of a  
244 nonenveloped circovirus could spontaneously and reversibly interconvert among multiple conformations. Technical  
245 limitations meant that we could not detect the conformational dynamics of capsid in real-time in the form of icosahedral  
246 virus particles or VLPs; therefore, unfortunately, we could not verify that the conformational features of the Capsid  
247 monomer were recapitulated in the assembled virus particle.

### 248 **GAGs and Neutralizing Antibodies Alter the Capsid's Conformational feature**

249 Heparan sulfate acts as the principal GAG receptor for the attachment of PCV2 capsid, which is partially mediated by  
250 electrostatic binding between the negatively charged chains of HS and basic amino acids within the target proteins(1, 39).  
251 Indeed, our binding experiments emphasized the superiority of HS over CSA and further demonstrated the requirement

252 for N-sulfation of heparin for interaction with the capsid. The dynamic equilibrium of the capsid was entirely  
253 rearranged by negatively charged heparin, ultimately triggering the emergence of the high-FRET state (Figures 3a and  
254 S2a). Notably, the negative charge-deficient heparan analog DeN heparin could induce transition from the low-FRET  
255 state to the intermediate-FRET state, but was insufficient to induce the high FRET state (Figures 3b and S2b). However,  
256 the competitive binding assay showed that DeN heparin was incapable of binding to the capsid protein or the virus  
257 (Figures 3d-g), indicating that the intermediate-FRET state was not an effective conformation for receptor interaction.  
258 Therefore, we hypothesized that the high-FRET state is indispensable to the efficient interaction between the capsid and  
259 the GAG receptor, and the hidden HS binding site might be exposed on the virion surface when negatively charged  
260 heparan sulfate is encountered (Figures 7). However, the current technique could not distinguish if the capsid  
261 conformational transitions occurred after the receptor binding to sustain the interaction or if the conformational  
262 transitions were induced by the receptor molecule before the binding event (40).

263 In contrast to the effect of HS, the capsid showed a tendency to stabilize in the low-FRET state in the presence of the  
264 anti-capsid neutralizing mAbs (Figures 4a and S3a), indicating that the neutralizing antibodies prevented the capsid from  
265 attaching to the cell surface by restricting the conformational dynamics and consequently disrupting the  
266 interaction between the capsid and HS. Interestingly, the antigenic epitope of the capsid recognized by neutralizing mAb  
267 3F6 is <sup>156</sup>YHSRYFT<sup>162</sup>(29), but not the HS-binding site. So we hypothesized that the interaction with the neutralizing  
268 mAb prevented the conformational transitions and restricted the capsid to the low-FRET state, thereby blocking the  
269 allosteric effects that expose the HS binding site to allow interaction with cell receptor (Figures 7). This could be  
270 considered as indirect evidence for the significance of the high-FRET state during the capsid-cell receptor interaction.

### 271 **Charge Distribution of the Binding Motif Dictated the Effective Receptor-ligand Binding**

272 The key factors that produce a hydrophilic pocket producing a complementary structure for the heparin-protein  
273 interaction are clusters of basic amino acids, especially arginine and lysine. The mutants with 99R or 100K displayed the

274 markedly attenuated affinity for heparin and reduced the binding capacity to the cell (Figures 6), subsequently impaired  
275 the infectivity of the rescued viruses. Likewise, the occurrence of the high-FRET state also decreased markedly as the  
276 number of positively charged amino acids in the binding motif decreased. Nonetheless, the conformational transition  
277 could still occur in the mutants in the presence of heparin (Figure 5c-d and S3e-f) and the binding of the mutants was not  
278 completely abolished, indicating that the interaction could be supported by the remaining positively charged amino  
279 acid(s) within the motif or by the existence of other binding sites, such as the weak HS binding sites on the surface of the  
280 PCV2 VLP.

### 281 **Biological significance of Conformational Feature Regulation During Virus Attachment**

282 The high-FRET state was revealed to be the crucial configuration during the Capsid-HS interaction for virus binding.  
283 This state reflected a distinct conformation in which the hidden HS binding site is vicinal to the exterior area of the virus  
284 particle. Besides, the existence of the intermediate-FRET state was especially conspicuous during the smFRET  
285 assays, but ultimately could not accomplish the receptor-ligand interaction. The existence and maintenance of the  
286 intermediate-FRET state could be quite meaningful and important for the biochemical events of the virus. It might  
287 prevent the conformational transition to the ultimate structure occurring too quickly when induced by an incomplete  
288 interforce and other biochemical attractive forces, thus minimizing meaningless binding to inappropriate receptors.

289

### 290 **Materials and Methods**

#### 291 **Protein Purification and Fluorophore Labeling**

292 Purified proteins were dissolved in labeling buffer (50 mM HEPES, 10 mM MgCl<sub>2</sub>, 10 mM CaCl<sub>2</sub>, 150 mM NaCl,  
293 pH 7.5), preincubated with a 50-fold molar excess of Tris (2-carboxyethyl) phosphine(T2556, Thermo Fisher) to reduce  
294 inter-molecular disulfide bond for 30 min at room temperature, then mixed with 10-fold molar excess CoA-Alexa 547  
295 (S9349S, New England Biolabs) and 5 μM ACPS at 37 °C for 90 min, followed by mixing with 20-fold molar excess of

296 Cy5-maleimide(PA25031, GE healthcare) at room temperature overnight (25, 34). Dual-labeled capsid proteins were  
297 separated using a PD Mini-Trap G-25 desalting column (GE healthcare) with imaging buffer (50 mM Tris, 150 mM  
298 NaCl, 1 mM Trolox(238813, Sigma-Aldrich), 0.8% glucose (w/v)(G8270, Sigma-Aldrich), 0.8% glucose oxidase  
299 (w/v)(G3660, Sigma-Aldrich), 0.8% catalase (w/v)( SRE0041, Sigma-Aldrich), pH 7.5). The labeling efficiency was  
300 calculated from protein concentration measured using BCA and fluorescence concentration estimated based on  
301 Lambert-Beer equation with absorbance at 550 & 630 nm. Finaly sample was stored at  $-80^{\circ}\text{C}$  until use.

### 302 **Circular Dichroism Spectrum Analysis**

303 Purified Capsids were measured using a Chirascan<sup>TM</sup>-Circular Dichroism (CD) Spectrometer (Applied Photophysics)  
304 with a path length of 0.1 mm. The CD spectra of the capsids were acquired between 200 and 300 nm with a 1-nm  
305 increment, and the spectrum of the free buffer solution was subtracted as background.

### 306 **Self-assembly of PCV2 Virus-like Particles**

307 Purified capsids were dialyzed in assembly buffer (NaH<sub>2</sub>PO<sub>4</sub> 0.1 M, Na<sub>2</sub>HPO<sub>4</sub> 0.1 M, Imidazole 20 mM, Tris base 0.01  
308 M, NaCl 0.15 M, KCl 0.05 M, MgCl 0.002 M, ammonium 0.1 M, glycerol 5%, Triton-X100 0.5%,  $\beta$ -mercaptoethanol 5  
309 mM, and PMSF 0.1 mM, PH-7.6) at 4  $^{\circ}\text{C}$  overnight, then subjected to an ÄKTA Purifier UPC 100 system (GE  
310 Healthcare) equipped with a prepacked HiPrep<sup>TM</sup> 16/60 Sephacryl<sup>TM</sup> S-300 HR column (GE Healthcare). The formation  
311 of PCV2 VLPs was observed using transmission electron microscopy (H-7650 TEM, Hitachi-Science &Technology,  
312 Japan).

### 313 **Single-molecule FRET Assay**

314 The smFRET experiment was performed based on a custom-built prism-based total internal reflection fluorescence  
315 (TIRF) microscopy method (Olympus IX81 microscope, Photometric Evolve 512 EMCCD, 50 mW, Coherent 532 nm  
316 solid-state laser). 10  $\mu\text{M}$  of samples was immobilized on a PEG(900393, Sigma-Aldrich)-passivated, streptavidin(85878,  
317 Sigma-Aldrich)-coated, quartz slide, pretreated with NaCl imaging buffer for 30 min to minimize the oligomerization.

318 The surface-bound capsid proteins were illuminated using the evanescent field generated by the total internal reflection  
319 of a 532-nm laser. Fluorescence emission was collected through a 1.49 NA 100 × oil-immersion objective (Olympus),  
320 and passed through a filter to remove Rayleigh scattering. Acceptor and Donor emissions were separated using a dichroic  
321 mirror into green and red emissions and projected onto the EMCCD. The single-molecule time traces of around 100s  
322 were collected at a rate of 10 frames/second using Micro-Manager( $\mu$ Manager, <https://micro-manager.org>).

### 323 **Flow Cytometry**

324 Trypsin digested cells were suspended, incubated with mAb 5E11 for 1.5 h at 37 °C, stained with FITC- goat  
325 anti-mouse IgG (ab6785, Abcam) for 1 h, and evaluated using a BD Accuri™ C6 Plus flow cytometer (BD Bioscience),  
326 and the ratio was analyzed using Flow Jo X 10.0.7 software(FlowJo, LLC, <https://www.flowjo.com>).

### 327 **High Performance Liquid Chromatography with Heparin-Sepharose**

328 Purified capsids (100  $\mu$ g) were loaded onto a 5-ml HiTrap™ Heparin-Sepharose HP Column (GE Healthcare), which  
329 then washed with Ca<sup>2+</sup> and Mg<sup>2+</sup>-free PBS to remove unbound molecules and eluted with gradually linear increasing  
330 concentrations of NaCl. The original sample, flow through, and elution fractions were collected, diluted to same  
331 concentration, and then analyzed using SDS-PAGE and immunoblotting.

### 332 **Microscale Thermophoresis Assay**

333 The Cy5-labeled capsid was incubated at a constant concentration of 20 nM with two-fold serial dilutions of heparin in  
334 MST-optimized buffer (50 mM Tris-HCl, pH 7.4, 150 mM NaCl, 1 mM MgCl<sub>2</sub>, 0.05% Tween-20). The mixtures were  
335 incubated for 15 min and added into glass capillaries and loaded into a Monolith NT.115 instrument (NanoTemper  
336 Technologies, Germany), the K<sub>d</sub> values were determined using NanoTemper Analysis software (NanoTemper  
337 Technologies, <https://nanotempertech.com>).

### 338 **Construction of a PCV2 Infectious Clone and Virus Rescue**

339 Site-specific mutagenesis to construct the 99R (SM) and 99R100K (DM) mutants was performed directly using PCR.



340 The linear genomes were extracted, cyclized using T4 DNA ligase (Takara), and transfected into PK15 cells with the  
341 jetPRIME® in vitro transfection reagent (CPT114vJ Polyplus-transfection). The transfected cells were cultured for 72 h  
342 and continuously passaged. The rescued samples were evaluated using indirect immunofluorescence assay and virus  
343 titers were calculated according to the Reed-Muench method.

#### 344 **Analysis of smFRET Data.**

345 Using custom made IDL software (Exelis Visual Information Solutions, <https://www.exelisvis.com>), hundreds of  
346 dual-labeled single-molecule spots were picked from the images of an acceptor detection channel by alternating the 532  
347 and 633 nm laser excitations. The intensities of Alexa 547 and Cy5 were analyzed by running the VBFRET software  
348 package script(The Gonzalez Laboratory, <http://www.columbia.edu/cu/chemistry/groups/gonzalez/software>) using a  
349 custom-made MATLAB algorithm (Mathworks, <https://www.mathworks.com>). The FRET efficiencies were calculated  
350 using the equation  $IA / (IA + ID)$ . All observed FRET data points were compiled into histograms using origin 9.0  
351 software (Originlab, <https://www.originlab.com/>), and histograms were fitted using three Gaussian distributions. The  
352 occupancy of each Gaussian peak was calculated as the ratio of peak covering area.

#### 353 **Statistical Analysis.**

354 All results are presented as means  $\pm$  the standard deviation (SD). Significant differences between treated and control  
355 groups were analyzed using Student's t test. The differences were considered significant and extremely significant at  $P$   
356 values  $< 0.05$  and  $< 0.01$ , respectively.

357

#### 358 **Acknowledgments**

359 This work was supported by the National Key Research & Development Program of China (2016YFD0500102,  
360 2015BAD12B01) and the National Natural Science Foundation of China (grant numbers 31230072, 31402198).

361

362 **Author Contributions**

363 J.Y.Z., J.R.L and J.Y.G. conceived the experiments. J.R.L and J.Y.G. prepared the samples and conducted most  
364 experiments. S.N.W and J.L. performed immunoblotting assays and constructed the infectious clone. J.W.Z., C.L.  
365 performed the purification of virus-like particles and observation of TEM. J.Y.Z. and J.R.L. analyzed and interpreted the  
366 data and wrote the manuscript.

367

368 **Declaration of Interests**

369 The authors declare no competing interests.

370

371 **References.**

- 372 1. Kjellen L, Lindahl U. 1991. Proteoglycans: structures and interactions. *Annu Rev Biochem* 60:443-75.
- 373 2. Rostand KS, Esko JD. 1997. Microbial adherence to and invasion through proteoglycans. *Infect Immun* 65:1-8.
- 374 3. Prydz K, Dalen KT. 2000. Synthesis and sorting of proteoglycans. *J Cell Sci* 113 Pt 2:193-205.
- 375 4. Li JP, Spillmann D. 2012. Heparan sulfate proteoglycans as multifunctional cell regulators: cell surface receptors.
- 376 *Methods Mol Biol* 836:239-55.
- 377 5. Sarrazin S, Lamanna WC, Esko JD. 2011. Heparan sulfate proteoglycans. *Cold Spring Harb Perspect Biol* 3.
- 378 6. Zautner AE, Jahn B, Hammerschmidt E, Wutzler P, Schmidtke M. 2006. N- and 6-O-sulfated heparan sulfates mediate
- 379 internalization of coxsackievirus B3 variant PD into CHO-K1 cells. *J Virol* 80:6629-36.
- 380 7. Bernfield M, Gotte M, Park PW, Reizes O, Fitzgerald ML, Lincecum J, Zako M. 1999. Functions of cell surface
- 381 heparan sulfate proteoglycans. *Annu Rev Biochem* 68:729-77.
- 382 8. Xu Y, Martinez P, Seron K, Luo G, Allain F, Dubuisson J, Belouzard S. 2015. Characterization of hepatitis C virus
- 383 interaction with heparan sulfate proteoglycans. *J Virol* 89:3846-58.
- 384 9. Tan CW, Poh CL, Sam IC, Chan YF. 2013. Enterovirus 71 uses cell surface heparan sulfate glycosaminoglycan as an
- 385 attachment receptor. *J Virol* 87:611-20.
- 386 10. Sasaki M, Anindita PD, Ito N, Sugiyama M, Carr M, Fukuhara H, Ose T, Maenaka K, Takada A, Hall WW, Orba Y,
- 387 Sawa H. 2018. The Role of Heparan Sulfate Proteoglycans as an Attachment Factor for Rabies Virus Entry and
- 388 Infection. *J Infect Dis* 217:1740-1749.
- 389 11. Joyce JG, Tung JS, Przysiecki CT, Cook JC, Lehman ED, Sands JA, Jansen KU, Keller PM. 1999. The L1 major
- 390 capsid protein of human papillomavirus type 11 recombinant virus-like particles interacts with heparin and
- 391 cell-surface glycosaminoglycans on human keratinocytes. *J Biol Chem* 274:5810-22.
- 392 12. Huan CC, Wang Y, Ni B, Wang R, Huang L, Ren XF, Tong GZ, Ding C, Fan HJ, Mao X. 2015. Porcine epidemic

- 393 diarrhea virus uses cell-surface heparan sulfate as an attachment factor. *Arch Virol* 160:1621-8.
- 394 13. Misinzo G, Delputte PL, Meerts P, Lefebvre DJ, Nauwynck HJ. 2006. Porcine circovirus 2 uses heparan sulfate and  
395 chondroitin sulfate B glycosaminoglycans as receptors for its attachment to host cells. *J Virol* 80:3487-94.
- 396 14. Cardin AD, Weintraub HJ. 1989. Molecular modeling of protein-glycosaminoglycan interactions. *Arteriosclerosis*  
397 9:21-32.
- 398 15. Ha T, Enderle T, Ogletree DF, Chemla DS, Selvin PR, Weiss S. 1996. Probing the interaction between two single  
399 molecules: fluorescence resonance energy transfer between a single donor and a single acceptor. *Proc Natl Acad Sci U*  
400 *S A* 93:6264-8.
- 401 16. Ha T. 2001. Single-molecule fluorescence resonance energy transfer. *Methods* 25:78-86.
- 402 17. Michalet X, Weiss S, Jager M. 2006. Single-molecule fluorescence studies of protein folding and conformational  
403 dynamics. *Chem Rev* 106:1785-813.
- 404 18. Munro JB, Gorman J, Ma X, Zhou Z, Arthos J, Burton DR, Koff WC, Courter JR, Smith AB, 3rd, Kwong PD,  
405 Blanchard SC, Mothes W. 2014. Conformational dynamics of single HIV-1 envelope trimers on the surface of native  
406 virions. *Science* 346:759-63.
- 407 19. Das DK, Govindan R, Nikic-Spiegel I, Krammer F, Lemke EA, Munro JB. 2018. Direct Visualization of the  
408 Conformational Dynamics of Single Influenza Hemagglutinin Trimers. *Cell* 174:926-937 e12.
- 409 20. Dennis TPW, Flynn PJ, de Souza WM, Singer JB, Moreau CS, Wilson SJ, Gifford RJ. 2018. Insights into Circovirus  
410 Host Range from the Genomic Fossil Record. *J Virol* 92.
- 411 21. Allan GM, Ellis JA. 2000. Porcine circoviruses: a review. *J Vet Diagn Invest* 12:3-14.
- 412 22. Finsterbusch T, Mankertz A. 2009. Porcine circoviruses--small but powerful. *Virus Res* 143:177-83.
- 413 23. Nawagitgul P, Morozov I, Bolin SR, Harms PA, Sorden SD, Paul PS. 2000. Open reading frame 2 of porcine  
414 circovirus type 2 encodes a major capsid protein. *J Gen Virol* 81:2281-7.

- 415 24. Khayat R, Brunn N, Speir JA, Hardham JM, Ankenbauer RG, Schneemann A, Johnson JE. 2011. The 2.3-angstrom  
416 structure of porcine circovirus 2. *J Virol* 85:7856-62.
- 417 25. Liu Z, Guo F, Wang F, Li TC, Jiang W. 2016. 2.9 Å Resolution Cryo-EM 3D Reconstruction of Close-Packed Virus  
418 Particles. *Structure* 24:319-28.
- 419 26. Wang N, Zhan Y, Wang A, Zhang L, Khayat R, Yang Y. 2016. In silico analysis of surface structure variation of PCV2  
420 capsid resulting from loop mutations of its capsid protein (Cap). *J Gen Virol* 97:3331-3344.
- 421 27. Wang D, Zhang S, Zou Y, Yu W, Jiang Y, Zhan Y, Wang N, Dong Y, Yang Y. 2018. Structure-Based Design of Porcine  
422 Circovirus Type 2 Chimeric VLPs (cVLPs) Displays Foreign Peptides on the Capsid Surface. *Front Cell Infect*  
423 *Microbiol* 8:232.
- 424 28. Mahe D, Blanchard P, Truong C, Arnauld C, Le Cann P, Cariolet R, Madec F, Albina E, Jestin A. 2000. Differential  
425 recognition of ORF2 protein from type 1 and type 2 porcine circoviruses and identification of immunorelevant  
426 epitopes. *J Gen Virol* 81:1815-24.
- 427 29. Shang SB, Jin YL, Jiang XT, Zhou JY, Zhang X, Xing G, He JL, Yan Y. 2009. Fine mapping of antigenic epitopes on  
428 capsid proteins of porcine circovirus, and antigenic phenotype of porcine circovirus type 2. *Mol Immunol* 46:327-34.
- 429 30. Roy R, Hohng S, Ha T. 2008. A practical guide to single-molecule FRET. *Nat Methods* 5:507-16.
- 430 31. Zhou Z, Cironi P, Lin AJ, Xu Y, Hrvatin S, Golan DE, Silver PA, Walsh CT, Yin J. 2007. Genetically encoded short  
431 peptide tags for orthogonal protein labeling by Sfp and AcpS phosphopantetheinyl transferases. *ACS Chem Biol*  
432 2:337-46.
- 433 32. Fairhead M, Howarth M. 2015. Site-specific biotinylation of purified proteins using BirA. *Methods Mol Biol*  
434 1266:171-84.
- 435 33. O'Donnell CD, Kovacs M, Akhtar J, Valyi-Nagy T, Shukla D. 2010. Expanding the role of 3-O sulfated heparan  
436 sulfate in herpes simplex virus type-1 entry. *Virology* 397:389-98.

- 437 34. Samsonov SA, Pisabarro MT. 2016. Computational analysis of interactions in structurally available  
438 protein-glycosaminoglycan complexes. *Glycobiology* 26:850-861.
- 439 35. He J, Cao J, Zhou N, Jin Y, Wu J, Zhou J. 2013. Identification and functional analysis of the novel ORF4 protein  
440 encoded by porcine circovirus type 2. *J Virol* 87:1420-9.
- 441 36. Feldman SA, Audet S, Beeler JA. 2000. The fusion glycoprotein of human respiratory syncytial virus facilitates virus  
442 attachment and infectivity via an interaction with cellular heparan sulfate. *J Virol* 74:6442-7.
- 443 37. Zaiss AK, Foley EM, Lawrence R, Schneider LS, Hoveida H, Secrest P, Catapang AB, Yamaguchi Y, Alemany R,  
444 Shayakhmetov DM, Esko JD, Herschman HR. 2016. Hepatocyte Heparan Sulfate Is Required for Adeno-Associated  
445 Virus 2 but Dispensable for Adenovirus 5 Liver Transduction In Vivo. *J Virol* 90:412-20.
- 446 38. Meneghetti MC, Hughes AJ, Rudd TR, Nader HB, Powell AK, Yates EA, Lima MA. 2015. Heparan sulfate and  
447 heparin interactions with proteins. *J R Soc Interface* 12:0589.
- 448 39. Bartlett AH, Park PW. 2010. Proteoglycans in host-pathogen interactions: molecular mechanisms and therapeutic  
449 implications. *Expert Rev Mol Med* 12:e5.
- 450 40. Kim E, Lee S, Jeon A, Choi JM, Lee HS, Hohng S, Kim HS. 2013. A single-molecule dissection of ligand binding to a  
451 protein with intrinsic dynamics. *Nat Chem Biol* 9:313-8.
- 452 41. Shriver Z, Capila I, Venkataraman G, Sasisekharan R. 2012. Heparin and heparan sulfate: analyzing structure and  
453 microheterogeneity. *Handb Exp Pharmacol* doi:10.1007/978-3-642-23056-1\_8:159-76.
- 454 42. Zhou JY, Chen QX, Ye JX, Shen HG, Chen TF, Shang SB. 2006. Serological investigation and genomic  
455 characterization of PCV2 isolates from different geographic regions of Zhejiang province in China. *Vet Res Commun*  
456 30:205-20.

**Fig.1**

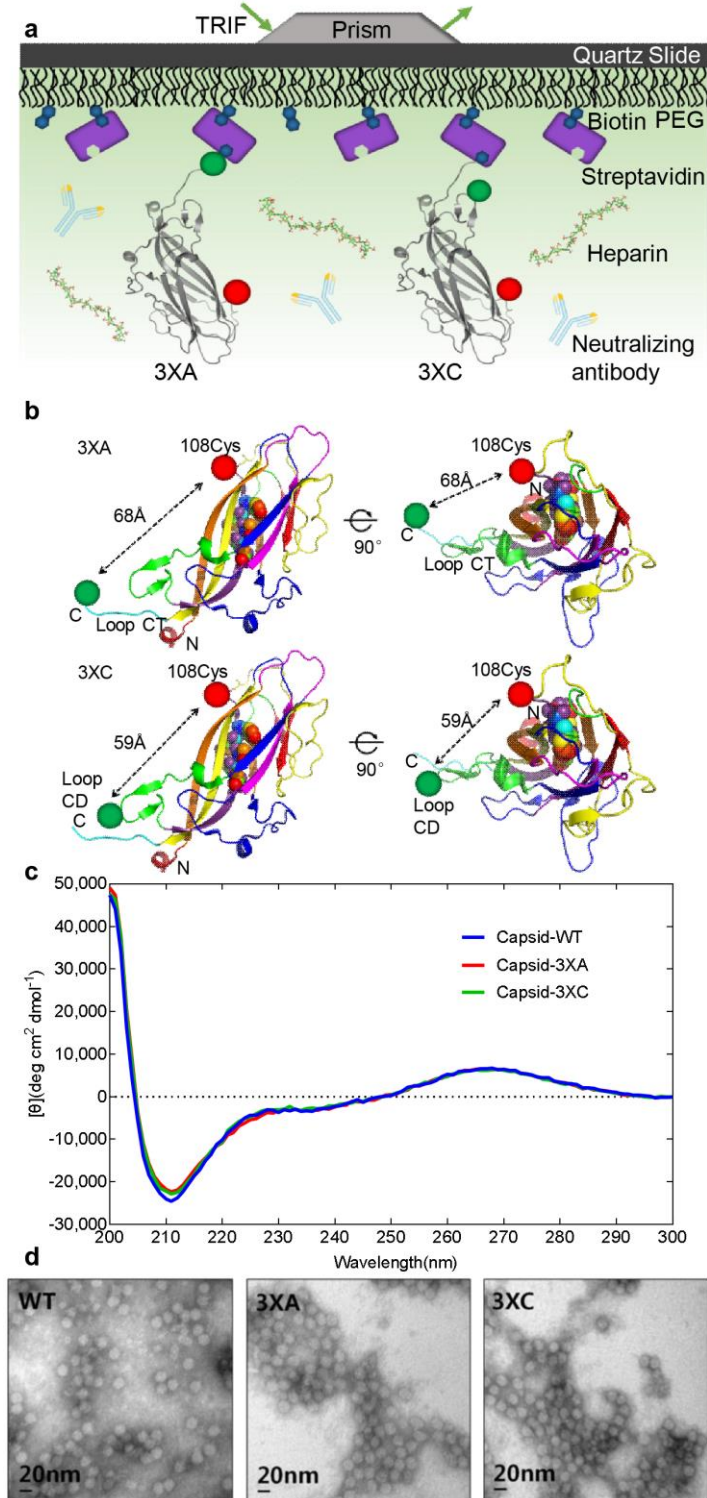

457

458

459 **Figure 1. Single-molecule FRET Method for Direct Capsid Visualization**

460 (a) Schematic of the smFRET-imaging assay. Capsid 3XA or 3XC protein monomers containing a single pair of dually  
461 labeled fluorophores were immobilized on quartz microscope slides, and imaged using TIRF microscopy at room  
462 temperature.

463 (b) Structural molecular models of Cy5/Alexa 547-labeled Capsid. Fluorophores Cy5 (red ball) and Alexa 547  
464 (green ball) were placed at the 108cysteine residue and at C-terminal loop (3XA) or at the CD loop (3XC), respectively.  
465 These labeled models reflected the conformation transitions by their changes in FRET efficiency. The putative  
466 HS binding site within the capsid is represented as a sphere. All the structures were adapted from PDB accession  
467 ID:3R0R.

468 (c) Circular dichroism assay of the secondary structure of soluble WT, 3XA, and 3XC capsids. The spectrum curve of the  
469 samples was acquired from the ellipticity data measured at a wavelength of 200–300 nm.

470 (d) Transmission electron microscopy imaging of PCV2 virus-like particles. Capsid-WT, Capsid-3XA and Capsid-3XC  
471 assembled into a hexagonal particle with a diameter of 17 nm.



**Fig.2**

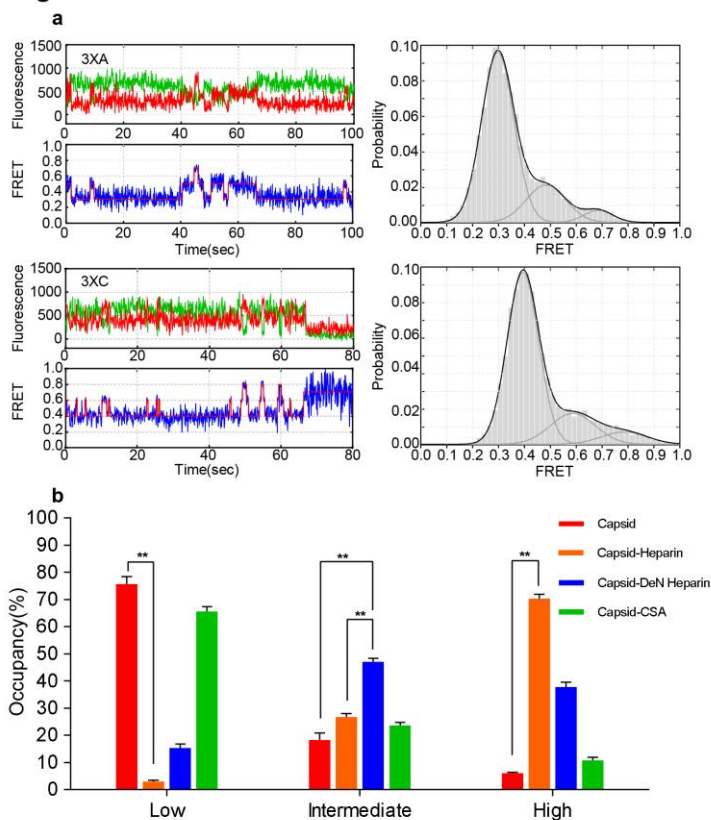

472

473 **Figure 2. The Multiple Conformational Distributions of the Capsid Protein**

474 (a) The landscapes of the capsid's conformational features. Representative fluorescence intensities of the donor and  
475 acceptor are shown as green and red, respectively, in the time trace; the original and idealized FRET values are shown  
476 as blue and red, respectively, in the FRET trajectories (left). The distinct FRET values of the main states fitted using  
477 HMM were approximately 0.29, 0.48, 0.68 (3XA) and 0.39, 0.59, 0.78 (3XC), corresponding to population FRET  
478 histograms fitted with three Gaussian distributions overlaid (black) (right).

479 (b) Occupancy of the smFRET state in Figures 2A and 3A-C. Student's t test was performed. \*,  $P < 0.05$ ; \*\*,  $P < 0.01$ .

**Fig.3**

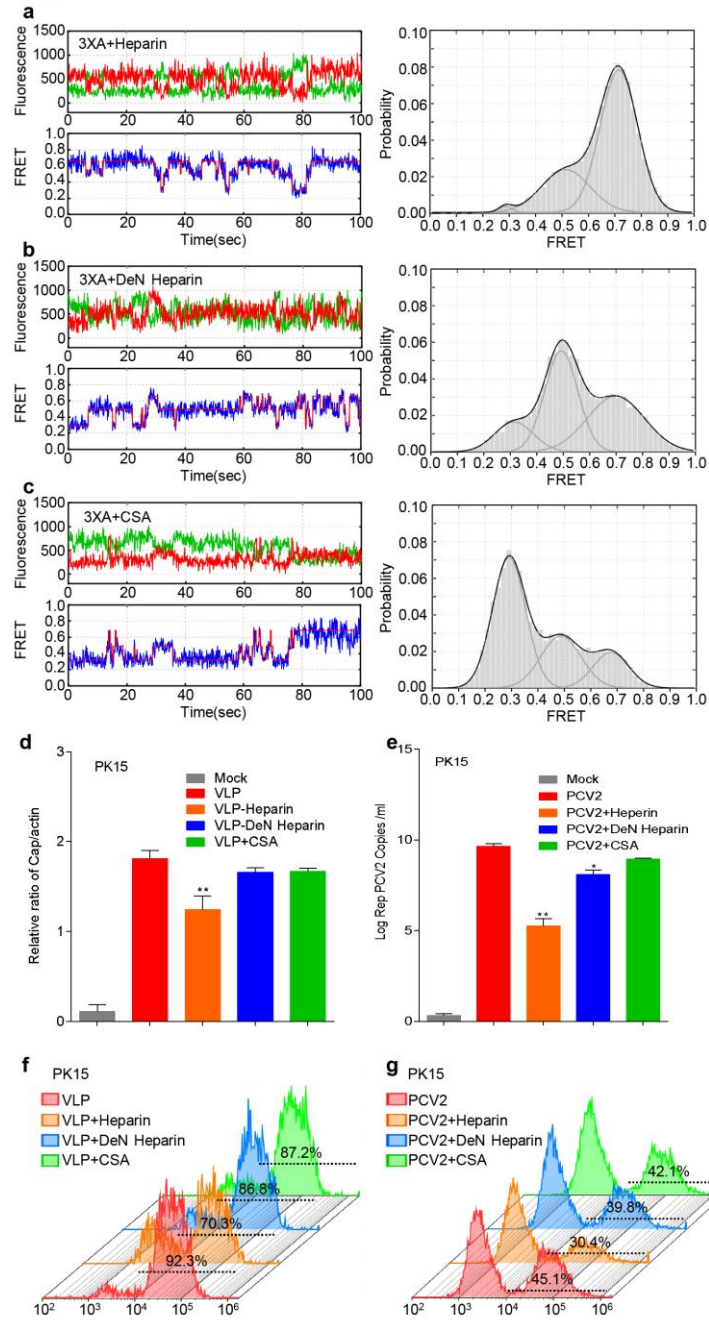

480

481

482

483

484

485

486 **Figure 3. Interaction with Heparin Regulates the Capsid Conformational landscape.**

487 (a-c) The histogram distribution and representative fluorescence time trace of the capsid protein's interaction with GAGs.

488 a, Capsid mixed with heparin. b, Capsid mixed with De-N-sulfated acetylated heparin. c, Capsid mixed with chondroitin

489 sulfate A. The concentration of GAGs was fixed at 2500 µg/ml.

490 (d-g) GAGs competitive binding experiments to host cells. Equal amounts of capsid-VLPs or PCV2 virions were

491 preincubated with heparin, De-N-sulfated acetylated heparin, and chondroitin sulfate A at 37 °C for 90 min, respectively.

492 The mixtures were then seeded onto PK-15 cells for 60 min at 4 °C. (d), the total amount of capsid protein bound to the

493 cell surface was analyzed using SDS-PAGE and western blotting. (e), the number of copies of attached PCV2 virions

494 was quantified using qPCR. (f), capsid-VLPs bound to PK15 cells as assessed using flow cytometry. (g), PCV2 attached

495 to PK15 cells as assessed using flow cytometry.

496

497

**Fig.4**

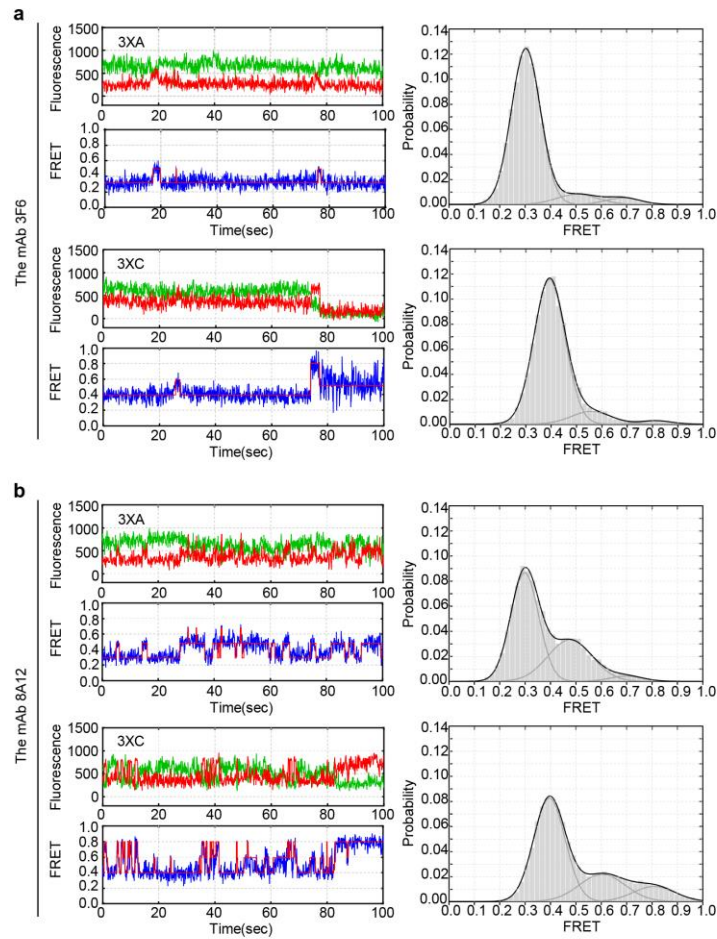

498

499 **Figure 4. Neutralizing Antibodies Restrict smFRET Conformations of the Capsid Protein**

500 Representative fluorescence time trace and histogram distribution of the anti-Capsid mAbs reaction with capsids 3XA

501 and 3XC. (a) Capsid binding to the neutralizing mAb 3F6 reveals an absolute predominance of the low-FRET state. (b)

502 Capsid binding to the non-neutralizing mAb 8A12 reveals a similar conformational feature to free capsids.

**Fig.5**

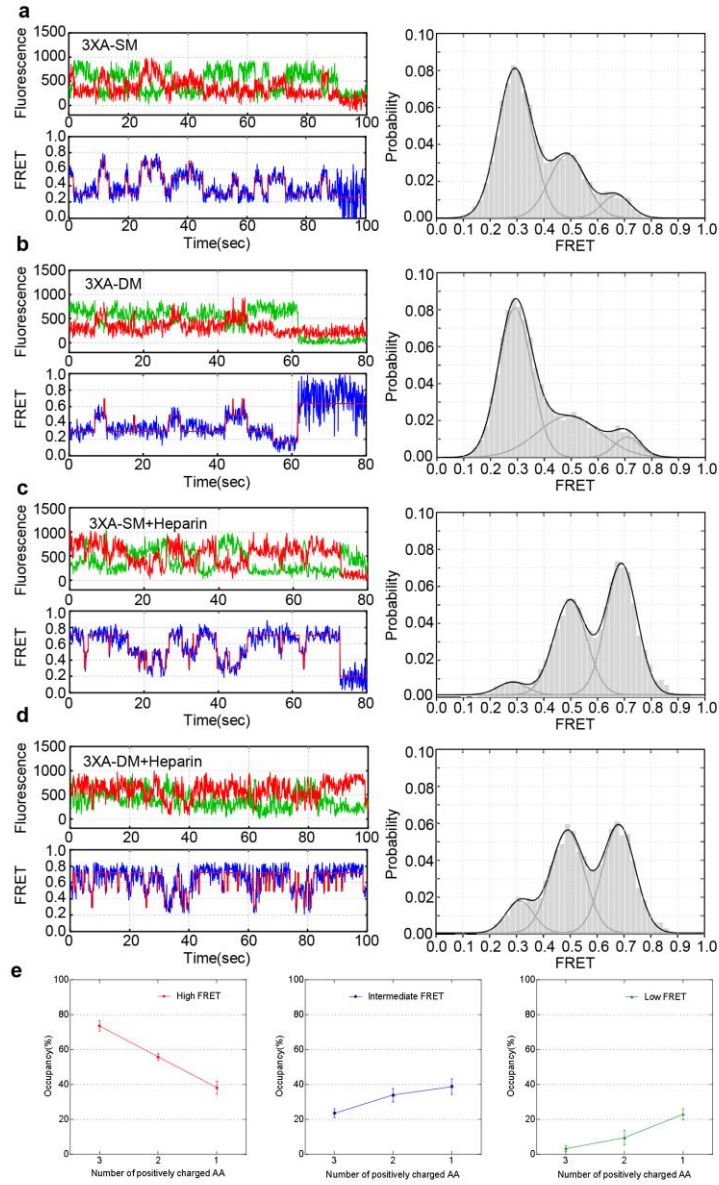

503

504

505 **Figure 5. Deficiency in Positively Charged Amino Acids in the Heparan Sulfate Binding Site Alters the smFRET**

506 **Conformational Feature of the Capsid Under the Effect of Heparin**

507 (a-b) Conformational features of capsids deficient in positively charged amino acids. The smFRET trajectories of

508 Capsid-SM and Capsid-DM showed the conformational feature of interconversion between the three intrinsic states. The

509 histogram shows the distribution of the distinct states, similar to the landscape of Capsid-WT.

510 (c-d) Representative fluorescence trajectories and histogram distributions of Capsid-SM and Capsid-DM mixed with

511 heparin.

512 (e) Curve of each state occupancy in relation to positively charged amino acid numbers within the binding motif based

513 on the histogram data in Figure 5a-d.



**Fig.6**

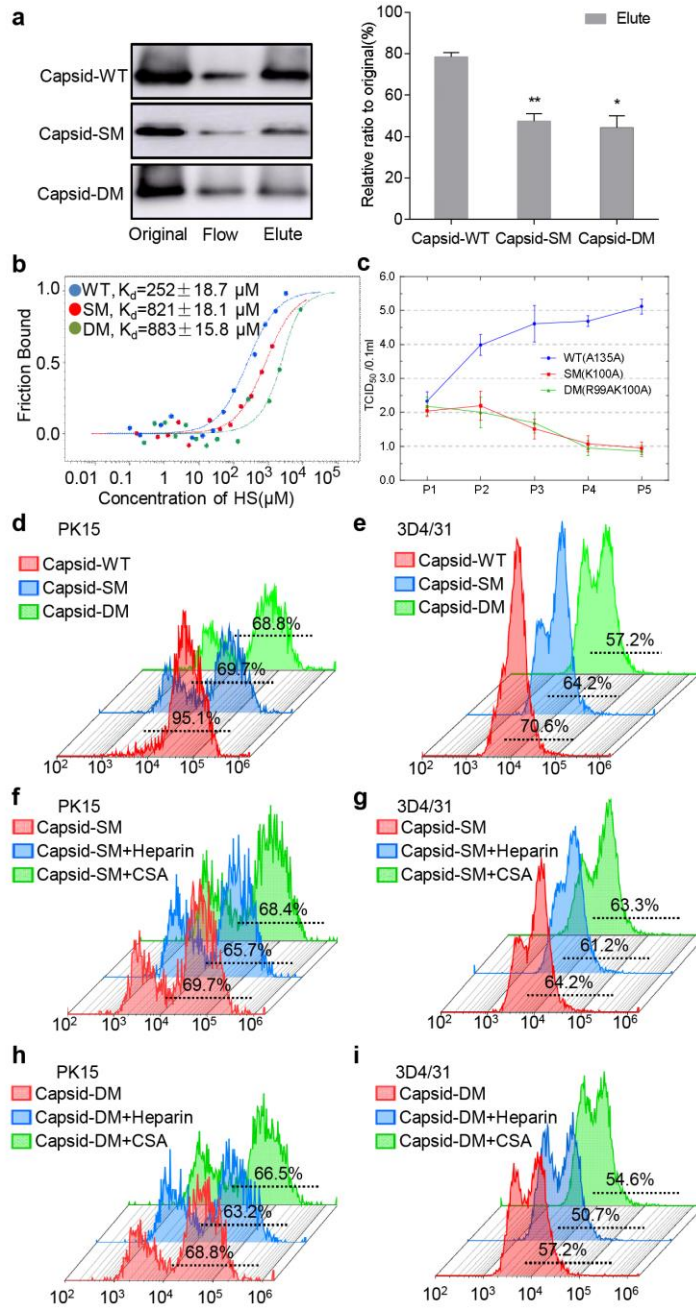

514

515

516 **Figure 6. The Charged Amino Acids within the Binding Site Regulate the Affinity of Capsid & Virion for the Host**

517 **Cells**

518 (a) Relative affinity of the WT, SM, and DM capsids to heparin was measured using HiTrap™ Heparin-Sepharose HP  
519 Column chromatography. The ratio of eluted to original amount was calculated to evaluate the relative affinity to  
520 Heparin-Sepharose of each sample.

521 (b) The dissociation constant ( $K_d$ ) between the capsid and heparin was measured using microscale thermophoresis. The  
522 Cy5 labeled WT, SM, and DM capsids were mixed at equal amounts with various concentration of heparin for 15 min at  
523 room temperature, and the  $K_d$  values were determined using microscale thermophoresis.

524 (c) Infectivity decrease of rescued viruses with deficient in positively charged amino acids in the binding motif.  $TCID_{50}$   
525 titration was performed according to the Reed-Muench method.

526 (d-i) Capsid-bound cells measured by flow cytometry. The PK15 and 3D4/31 cells were incubated with Capsid-WT,  
527 Capsid-SM, Capsid-DM, or mixtures of Capsid-SM/Heparin, Capsid-DM/Heparin, Capsid-SM/CSA, and  
528 Capsid-DM/CSA, separately. The resultant cells were assessed by flow cytometry. (d), Capsid positive PK15 cells; (e),  
529 Capsid positive 3D4/31 cells; (f), Capsid-SM positive PK15 cells; (g), Capsid-SM positive 3D4/31 cells; (h), Capsid-DM  
530 positive PK15 cells; and (i), Capsid-DM positive 3D4/31 cells.



**Fig.7**

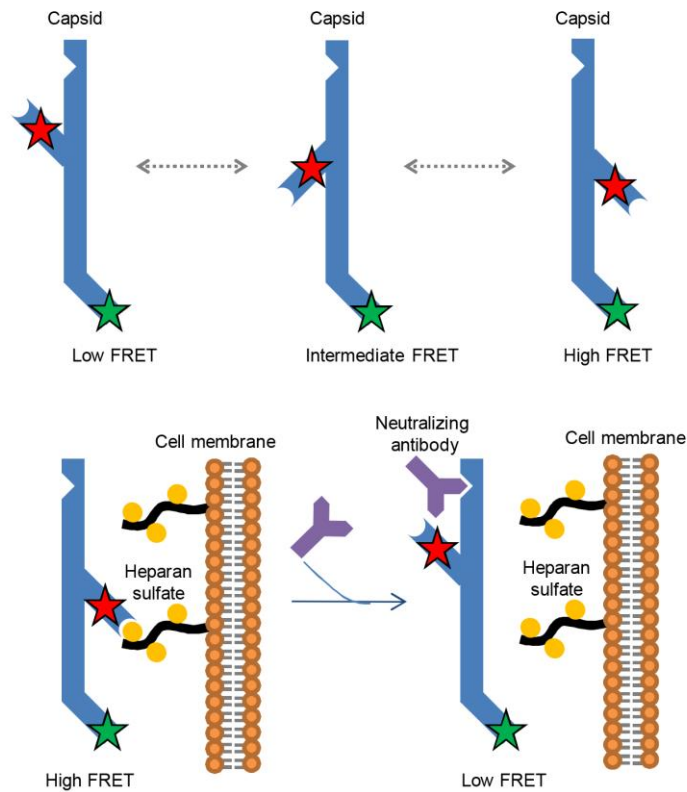

531

532 **Figure 7. Model of Capsid Conformational changes associated with attachment to the cell surface**

533 Interaction with the receptor HS promotes the preponderance of the high-FRET state and exposes the hidden HS binding

534 site. By contrast, interaction with the anti-Capsid neutralizing mAb results in prevention of the conformational transition

535 and restriction to the low-FRET state, thereby blocking exposure of the HS binding site and preventing the interaction

536 with the cell receptor heparan sulfate.

## Figure S1

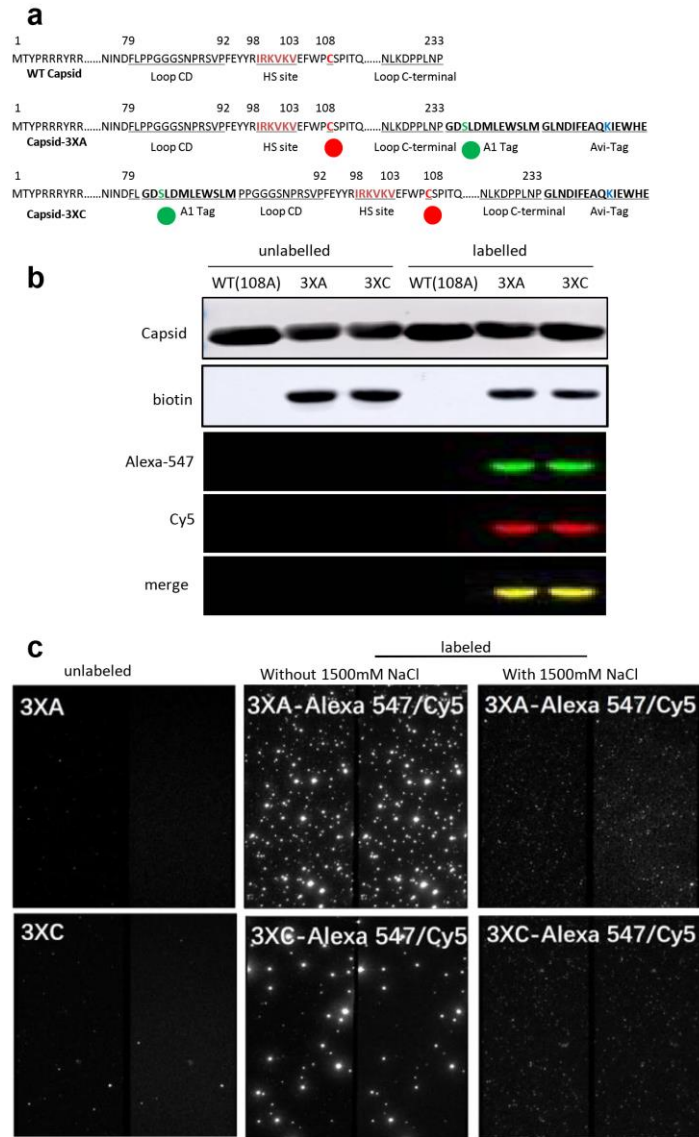

537

538

539 **Figure S1. Strategy for Site-specific Attachment of the Donor & Acceptor Fluorophore Pair.**

540 (a) Schematic of the engineered capsids 3XA and 3XC, based on the WT capsid sequence of the PCV2 HZ0201 isolate.

541 The putative heparin binding motif 98IRKVKV103 is highlighted in crimson. 108cysteine is highlighted in red and

542 labeled by Cy5 (red ball). The A1-tag peptide (GDSLDMLEWSLM) was inserted at the C-terminus (3XA) or between

543 the 80Leucine and 81Proline residues (3XC) to attached Alexa-547 (green ball). The Avi-tag peptide

544 (GLNDIFEAQKIEWHE) was added at the C-terminus for the adhesion of D-biotin.

545 (b) Western blotting assay of Cy5/Alexa 547 labeled capsid-3XA and capsid-3XC. Alexa-547 and Cy5 were excited by

546 lasers at 520 nm and 630 nm, respectively. The conjugated biotin was identified using HRP-streptavidin.

547 (c) Capsids were subjected to the fluorescent labeling reaction, surface immobilized, and imaged using TRIF. The donor

548 and acceptor channels view of the passivated slides immobilized with unlabeled dCapsid 3XA or 3XC (left); with

549 labeled dCapsid 3XA or 3XC (middle); or with labeled dCapsid 3XA or 3XC pretreated with 1500 mM NaCl

550 imaging buffer for 30 min to eliminate oligomerization (right).

**Figure S2**

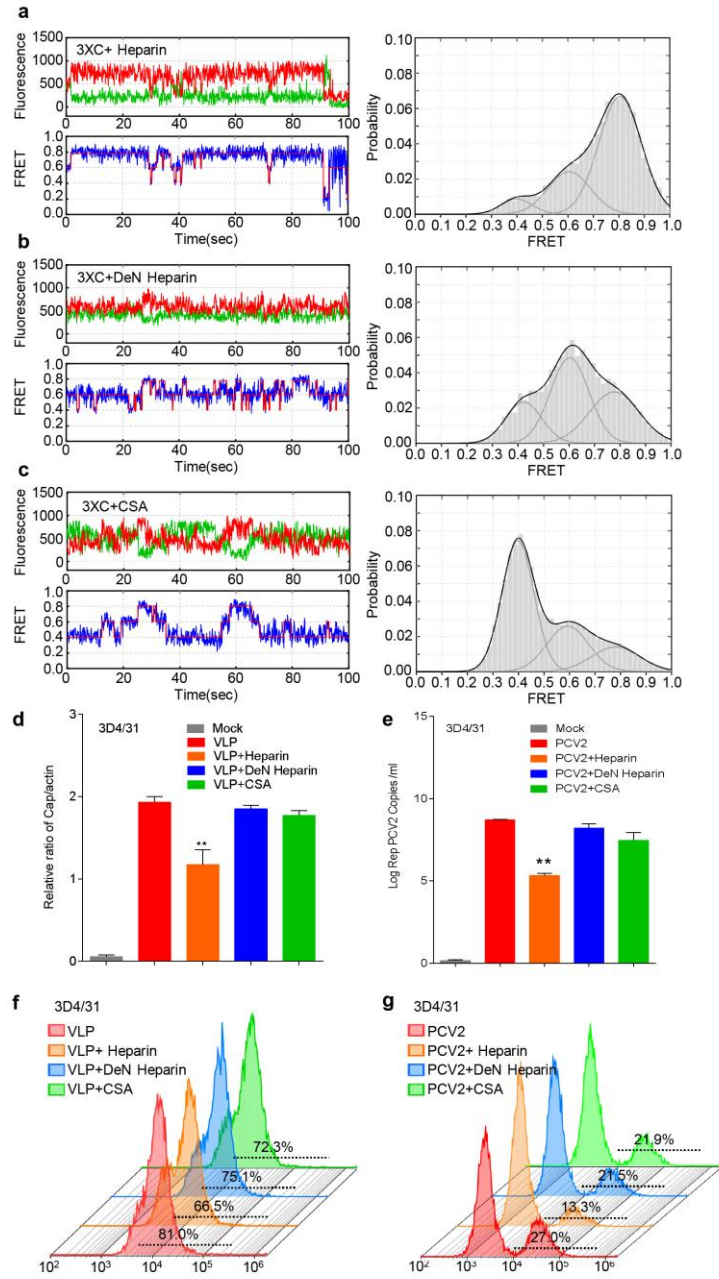

551

552

553 **Figure S2. Interaction with Heparin Induced the High-FRET Conformation of Capsid.**

554 (a-c) Typical Capsid-3XC fluorescence time trace and the histogram distribution with exogenous soluble GAGs. (a),  
555 Capsid-3XC mixed with heparin. (b), Capsid-3XC mixed with De-N-sulfated acetylated heparin. (c), Capsid-3XC mixed  
556 with chondroitin sulfate A. The concentration of GAGs was fixed at 2,500 µg/ml.

557 (d-g) Competitive binding assay of VLPs and PCV2 particles for 3D4/31 cells. The experimental protocol is identical to  
558 that detailed in Figure 3. (d), Western blotting analysis of VLPs bound to soluble GAGs. E, qPCR assay of PCV2  
559 virions bound with soluble GAGs. (f), percentage of VLPs bound to 3D4/31 cells, as assessed using flow cytometry. (g),  
560 Percentage of PCV2 bound to 3D4/31 cells, as measured using flow cytometry.

561

562

**Fig.S3**

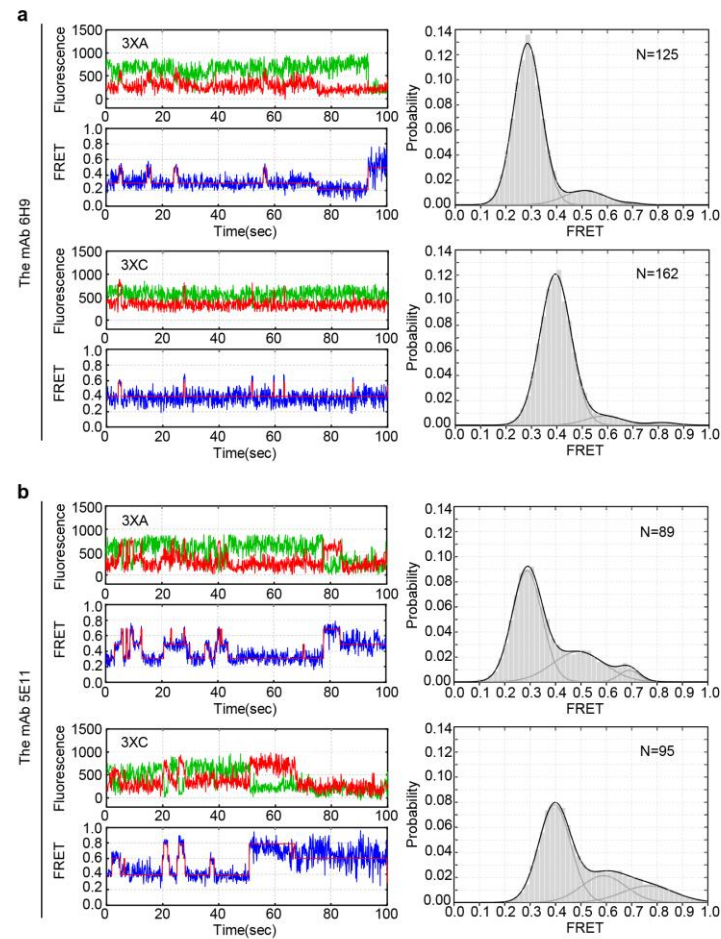

563

564 **Figure S3. The Conformational Landscapes of Capsids Treated with Anti-Capsid Antibodies.**

565 The typical fluorescence time trace and histogram distribution of capsids 3XA and 3XC reacting with mAbs. (a), Capsids

566 treated with neutralizing mAb 6H9 reveal an absolute predominance of the low-FRET state. (b), Capsids treated with

567 non-neutralizing mAb 5E11 display a similar conformational distribution to free capsids (See Figure 2).





570 **Figure S4. Deficiency of Positively Charged Amino Acids of the Binding Site Affects the Affinity to Heparin.**

571 (a) The conservation of the putative heparin sulfate binding motif in the capsid sequence. All the amino acid sequence  
572 data were obtained from GenBank. The location and sequence of the canonical putative heparin sulfate binding motif is  
573 highlighted using a red frame.

574 (b) Schematic of the predicted local structure of the heparan binding site in the positively charged amino acid deficient  
575 mutants. The positively charged amino acids are labeled in blue and the uncharged amino acids are labeled in white. Left,  
576 the abundant side chain powered by the basic amino acids in capsid-WT. Middle, the side chain was reduced because of  
577 the K100A mutation in Capsid-SM. Right, the side chain was reduced because of the 99R100K to 99A100A mutations in  
578 Capsid-DM. This local structural prediction was performed on the basis of the revealed capsid structure (PDB:3R0R)  
579 and presented using the PyMOL software.

580 (c-d) Typical smFRET trajectories and histogram distributions of Capsid-3XC- SM (c) and DM (d). Conformational  
581 features of the positively charged amino acids deficiency mutants are similar to those of free Capsid-WT.

582 (e-f) Representative Capsid-3XC fluorescence time trace and the histogram distribution of Capsid-SM(e) and  
583 Capsid-DM(f) with added exogenous heparin.
